# Supplementary material for: Exploring the Role of E6 and E7 Oncoproteins in Cervical Oncogenesis through MBD2/3-NuRD Complex Chromatin Remodeling
Source: MDPI journal article supplement (doi:10.3390/genes15050560), 2024-04-27
Supplement: s1 [file s1]

Supplementary Tabel S1. Primer sequences for the investigated target genes and their silencing efficiency at three concentrations: C1, C2 and C3, after 24, respectively 48 hours.

[illegible]

Supplementary Table S2. Primer sequences for the investigated target genes

| Gene       | Primer forward                 | Primer reverse                  |
|------------|--------------------------------|---------------------------------|
| E6HPV16    | 5'-GCATAAATCCCGAAAAGCAA-3'     | 5'-AGCGACCCAGAAAGTTACCA-3'      |
| E7HPV16    | 5'-GCTCAGAGGAGGAGGATGAAATAG-3' | 5'-TCCGGTTCTGCTTGCCAG-3'        |
| GAPDH      | 5'-CCATCTTCCAGGAGCGAGATCCCT-3' | 5'-TGAGCCCCAGCCTTCTTCATGGT-3'   |
| PHF6       | 5'-GGAGAACCGAGACCGACTTC-3'     | 5'-GTCTCAAGAAATGCGGCAGG-3'      |
| SF3B1      | 5'-AAAAGCATAGGCGGACCATGA-3'    | 5'-GGGGTTTTCCCTCCATCTGC-3'      |
| FGF16      | 5'-CTGGAGATCTTCCCCAACGG-3'     | 5'-AACTCCAGGATTCCGAAGCG-3'      |
| MAGEB17    | 5'-CCGGAAGTGAGGATCTTCGT-3'     | 5'-GGAGGTGGGCACCTTGATAC-3'      |
| LINC02036  | 5'-AGCTCACCGGTAGCCTAGAA-3'     | 5'-ATATGGCTCAGCCGCATCTC-3'      |
| EIF4G3     | 5'-ACAGAATGCAGGTCCAACCA-3'     | 5'-GGCCTCTGAAAAACGGAGA-3'       |
| LINC02720  | 5'-AGCTCACCGGTAGCCTAGAA-3'     | 5'-ATATGGCTCAGCCGCATCTC-3'      |
| EQTN       | 5'-TCCAAATGGCACTGAGTCTGA-3'    | 5'-AGTTGCATTGACAGTTTTATCGTT-3'  |
| KCNJ3      | 5'-CTCACGCTTATGTTCCGGGT-3'     | 5'-GTGTCTGCCGAGATTTGAGC-3'      |
| LGMN       | 5'-CACAGCTGCTACCCAGAGG-3'      | 5'-AACGCATACTCGTACGTGGG-3'      |
| DDHD1      | 5'-ATTGTTTTAGGGGCCAGCAGA-3'    | 5'-AGTTGATCCCACTGCCATCT-3'      |
| LINC01222  | 5'-AGCAGGGGTAACATTATGGGC-3'    | 5'-AGTCTTTGTAGGTCACCAACCC-3'    |
| PSEN2      | 5'-AAGGGCCTCTGAGAATGCTG-3'     | 5'-CCACACCATGGCAGATGAGT-3'      |
| CHMR3      | 5'-CTACCTGGAACAGGCCAACAC-3'    | 5'-TGCCAATAAGACTTGTGAGTTCCA-3'  |
| ZFPM2      | 5'-TCCACAGAATTTGGGCCTGA-3'     | 5'-TGGATTCCTTCATCATCACCTTTG-3'  |
| THEMIS     | 5'-CTGCCTATGAATTTCCAGGTCT-3'   | 5'-TGGTCCAATATGAATGGTCCTTGT-3'  |
| CDK6       | 5'-CTGCAGGGAAAGAAAAGTGCAA-3'   | 5'-CTCCTCGAAGCGAAGTCCTC-3'      |
| TRIM60     | 5'-TCCAACCTGCTCCAGGTCATC-3'    | 5'-AGGTTATAATACAGCGGTCATCCC-3'  |
| LINC00936  | 5'-GCGTTTAAGGGGAGGACCC-3'      | 5'-GCGCGGCAAGTTCTAATCG-3'       |
| GIPC2      | 5'-TCTCGCCGTCGGAGATCTTA-3'     | 5'-CCTCCTAAGAGTCTTCCATGTCA-3'   |
| DCP2       | 5'-GGTAAAGCACAGGCAACCAC-3'     | 5'-TCCCTCATACTTTGATTCTTTCCT-3'  |
| DLC1       | 5'-GCTCCTCGTTGTCTAGGTGG-3'     | 5'-TGAGGGTAAAGGAGATGGAAC-3'     |
| SEMA5A-AS1 | 5'-CCTTGTGGCCACTACTGAACT-3'    | 5'-GTGGCATTCCTCCATAGGCTT-3'     |
| CCDC138    | 5'-CTGCCCCGACGAGTATGATT-3'     | 5'-CCAAATCACCTGGGGAGGTT-3'      |
| NRIP1      | 5'-ACACAGCCAGAAGATGCACA-3'     | 5'-AGGCTGTTGAAAAGTAGCTCTGA-3'   |
| ARHGEF28   | 5'-CCATCGCTCCAGATGCGAAA-3'     | 5'-GCATAGATCATCATCTGCCCCG-3'    |
| CLEC16A    | 5'-CAACCACCCTGAAAGCATGG-3'     | 5'-GGCCTGGTTATCCAATGACAC-3'     |
| CDH17      | 5'-ATCGACCCACGTTTCTCCAG-3'     | 5'-CAGTCCTCTCTAGGAGATGAAGTTT-3' |
| ATXN10     | 5'-AGAGCAGCGGAACCGAGAA-3'      | 5'-GCAGGCAAGCTCAACAGCAT-3'      |
| EPHA3      | 5'-TCACGGGTGTGGAGTACAGT-3'     | 5'-ACCAACCTTTTTCATGTCATCTGT-3'  |
| LRRC4C     | 5'-GTAGTGACGGCAAGCTAGA-3'      | 5'-TCGCAGTAAAGAGAACCATTCTTC-3'  |
| OR13F1     | 5'-TGGTTTGTGTGGACACCTCC-3'     | 5'-TGAGTAGCATTGGCATGGGG-3'      |

|                     |                              |                                 |
|---------------------|------------------------------|---------------------------------|
| <b>FAM71D</b>       | 5'-AGCCCCACCTGTTGATTTTCAT-3' | 5'-CAGTCCTCTCTAGGAGATGAAGTTT-3' |
| <b>LOC101928446</b> | 5'-CCCAGGGATCCCCTGACATA-3'   | 5'-GAACCTGGGTGGGCCTTATT-3'      |
| <b>PTGDR</b>        | 5'-GGGAGTAGGTGAGGCTTGAG-3'   | 5'-GTAAGCGCGATACTTGGGAG-3'      |
| <b>GPR15</b>        | 5'-TGCTCTTTGGTGATGGACCC-3'   | 5'-CAGAGTTTGGGCTCGTAGCA-3'      |
| <b>FABP6</b>        | 5'-GCCACACCATGACCAACAAG-3'   | 5'-ATCTGCACAGTGGCCTTGAA-3'      |
| <b>MIR490</b>       | 5'-TGGAGGCCTTGCTGGTTTG-3'    | 5'-TCCTCCAGGTTGGTGCATCT-3'      |
| <b>LRRC52</b>       | 5'-TGCTCTTTCCTGGACTTCGC-3'   | 5'-TGGCATTAGATCATCTGAGGGG-3'    |
| <b>CHEK2P2</b>      | 5'-TGGTAGTGGATCCAAAGGCAT-3'  | 5'-GTCTTCATCCTGAAGCCACAGT-3'    |
| <b>DSG2</b>         | 5'-TGCTGCTTCTCCTGATCTGC-3'   | 5'-GCAGCTTATTTTCATTTCTTGCT-3'   |
| <b>KANK3</b>        | 5'-TGCGGCTTCAGGGTGC-3'       | 5'-GCAGGTTCTGATTACAGGGCA-3'     |
| <b>EPCAM-DT</b>     | TGGGGGATGAAGGGTGGTTA-3'      | TTCTTGGCATATCAGGGGGA-3'         |
| <b>STHG4</b>        | GCCCAGCTGTTCAAAAACCC-3'      | GCCCATTTTGGCTATGGTCG-3'         |
| <b>PROKR2</b>       | GTGACTCTCGATCCGGCTTC-3'      | GCTGCCATGGTGATGTCTGT-3'         |
| <b>LINC01718</b>    | CTCCACAGCCTCGTGTGTTA-3'      | TCGCTATGATTTCTCCGGC-3'          |
| <b>CCDC134</b>      | GCTGTTAGCCTGTTGGACCT-3'      | TCCAAACCTCTTGAGCTGGC-3'         |
| <b>IL1RAP</b>       | ACTAGAACATCAGCAGGCCC-3'      | ACCACAGAAGTGTCATCCTTTGA-3'      |
| <b>FAT1</b>         | CGGGCCAACCTTGCGATTTC-3'      | GGAGCAGAAGCAGGAGCAAA-3'         |
| <b>RHOH</b>         | TTCTCCTTCACACACCAGTTGA-3'    | CTTCTCCCTGCCCATCCAAG-3'         |
| <b>MRPS30</b>       | ATCAGCTGGTGTCAACCCTC-3'      | GGGCATCTATAATCGAGGGCG-3'        |
| <b>TTC33</b>        | CCGCTTCTGTGGACTGTTCG-3'      | ACCCAAAGGAAGCCATTCTGC-3'        |
| <b>FAXC</b>         | ACTCCTGGTCATTAGGAAACAGC-3'   | GGAACACCATTGTTAGGTCTTGC-3'      |

Supplementary Table S3: Cell cycle and total apoptosis distribution in silenced or unsilenced CaSki cells with shRNAs

| shRNAs          | 24 hours |       |      |                   | 48 hours |       |      |                  |
|-----------------|----------|-------|------|-------------------|----------|-------|------|------------------|
|                 |          |       |      | Total apoptosis   |          |       |      | Total apoptosis  |
|                 | %G1      | %G2+M | % S  | Q2+Q4             | %G1      | %G2+M | % S  | Q2+Q4            |
| <b>shRNAE6</b>  | 62.6     | 1.8   | 35.5 | 1,7+ 14,9 = 16,6% | 53.1     | 0.3   | 46.6 | 10,7 +42=52,7%   |
| <b>shRNAE7</b>  | 62.6     | 0.3   | 37.1 | 12,8+ 2,5=15,3%   | 56       | 4     | 40   | 24,2 +12,9=37,1% |
| <b>shjRNA23</b> | 57.3     | 2.5   | 40.2 | 10,2+ 22,3=32,5%  | 69.4     | 17.5  | 14.1 | 19 +48,2=67,2%   |
| <b>Control</b>  | 55       | 10.8  | 34.2 | 1.5+0.3=1.8%      | 53.5     | 0.5   | 46   | 8.5+1.3=9.8%     |

Supplementary Table S4: Time dependent percentage of silencing with shRNAs

| shRNA           | Percentage (%) of silencing / |       | Percentage (%) of silencing / |  |
|-----------------|-------------------------------|-------|-------------------------------|--|
|                 | 24 hours                      |       | 48 hours                      |  |
| <b>shjRNA23</b> | <b>E6</b>                     | 79.51 | 43.18                         |  |
|                 | <b>E7</b>                     | 66.66 | 30.26                         |  |
| <b>shE6RNA</b>  |                               | 80.45 | 55.71                         |  |
| <b>shE7RNA</b>  |                               | 63.27 | 49.83                         |  |

Table S5. Significantly enriched motifs and associated transcription factors

| Genes     | Motifs                                                                              | Stamp<br>E-value | Transcriptional<br>factors                                  |
|-----------|-------------------------------------------------------------------------------------|------------------|-------------------------------------------------------------|
| shE6RNA   |                                                                                     |                  |                                                             |
| MAGEB17   |    | 2.5e-09          | BATF::JUN                                                   |
| LINC02036 |    | 2.1e-09          | ZCSAN16                                                     |
| EIF4G3    |    | 2.4e-09          | HOXA13_MEIS1                                                |
| LINC01222 |  | 3.7e-09          | Homeobox<br>protein Nkx-2.5                                 |
| PSEN2     |  | 2.2e-08          | ZBTB40                                                      |
| CHRM3     |  | 2.8e-08          | ZNF223                                                      |
| shE7RNA   |                                                                                     |                  |                                                             |
| FGF16     |  | 1.8e-09          | TATA box<br>binding protein                                 |
| PHF6      |  | 1.3e-07          | Pituitary-specific<br>positive<br>transcription<br>factor 1 |
| SF3B1     |  | 2.2e-09          | NFAT5                                                       |

|                  |                                                                                     |         |                           |
|------------------|-------------------------------------------------------------------------------------|---------|---------------------------|
| OR13F1           |    | 3.9e-10 | TFEB                      |
| EPHA3            |    | 2.0e-07 | TATA-box-binding protein  |
| ATXN10           |    | 1.1e-07 | STAT5B                    |
| LRRC4C           |    | 8.9e-10 | Bhlha15                   |
| RSBN1L           |    | 7.8e-09 | TATA-box-binding protein  |
| MRPS30           |   | 6.5e-09 | Forkhead box protein O1   |
| C16orf78 (STPG4) |  | 1.9e-08 | ZNF596                    |
| ZNF585A          |  | 9.4e-07 | ZNF134                    |
| shj23RNA         |                                                                                     |         |                           |
| ZFPM2            |  | 4.8e-07 | FOXJ2_PITX1, FOXJ2::PITX1 |
| THEMIS           |  | 9.4e-06 | FOXB1                     |
| CDK6             |  | 2.2e-07 | Homeobox protein Nkx-2.5  |

|                |                                                                                      |         |                                                                                                                                       |
|----------------|--------------------------------------------------------------------------------------|---------|---------------------------------------------------------------------------------------------------------------------------------------|
| TRIM60         |     | 3.4e-08 | ALX1                                                                                                                                  |
| LINC00936      |     | 1.3e-07 | FOXJ2_PITX1,<br>FOXJ2::PITX1                                                                                                          |
| GIPC2          |     | 1.8e-06 | FOXJ2_PITX1,<br>FOXJ2::PITX1                                                                                                          |
| DCP2           |     | 6.4e-07 | Zinc finger<br>protein 217                                                                                                            |
| DLC1           |     | 1.5e-07 | NFYA                                                                                                                                  |
| SEMA5A-<br>AS1 |    | 6.8e-08 | POU6F1,<br>T093398_1.02                                                                                                               |
| CCDC138        |   | 5.8e-06 | NR1D1                                                                                                                                 |
| NRIP1          |   | 2.3e-08 | ZNF184 +<br><br>BCL6<br>(transcriptional<br>repressor which<br>has emerged as a<br>critical regulator<br>of germinal<br>centers (GC)) |
| ARHGEF28       |   | 3.6e-09 | SOX15                                                                                                                                 |
| CLEC16A        |  | 8.8e-09 | ATF4                                                                                                                                  |

|           |                                                                                     |         |                                                                                                          |
|-----------|-------------------------------------------------------------------------------------|---------|----------------------------------------------------------------------------------------------------------|
| CDH17     |    | 1.5e-06 | POU6F1                                                                                                   |
| FAM71D    |    | 3.0e-07 | NKX2-8                                                                                                   |
| LINC02720 |    | 1.1e-09 | ZNF324                                                                                                   |
| PTGDR     |    | 2.5e-10 | NEUROD1                                                                                                  |
| GPR15     |    | 4.2e-12 | Histone-lysine N-methyltransferase PRDM9                                                                 |
| FABP6     |  | 1.9e-06 | ZNF304                                                                                                   |
| MIR490    |  | 1.6e-08 | EKLF, Erythroid krueppel-like transcription factor, HBFQTL6, INLU, KLF1_R328H_R2, Krueppel-like factor 1 |
| LRRC52    |  | 2.4e-11 | ZNF280D                                                                                                  |
| CHEK2P2   |  | 4.1e-11 | GLI3                                                                                                     |
| DSG2      |  | 1.6e-08 | EKLF, Erythroid krueppel-like transcription factor, HBFQTL6, INLU, KLF1_R328H_R2,                        |

|              |                                                                                                                                                                            |         |                                        |
|--------------|----------------------------------------------------------------------------------------------------------------------------------------------------------------------------|---------|----------------------------------------|
|              |                                                                                                                                                                            |         | Krueppel-like factor 1                 |
| KANK3        |                                                                                           | 2.4e-10 | ZNF182                                 |
| LOC101927043 |                                                                                           | 3.8e-09 | CEBPG                                  |
| C2orf61      |                                                                                           | 8.9e-08 | Wilms tumor protein                    |
| PROKR2       |                                                                                          | 3.0e-10 | ZBTB14                                 |
| LINC01718    |                                                                                         | 2.5e-10 | ZNF627                                 |
| CCDC134      | <br> | 2.9e-13 | ZNF384                                 |
|              |                                                                                                                                                                            | 8.8e-10 | ELF3                                   |
| IL1RAP       | <br> | 1.6e-06 | Zinc finger protein 217                |
|              |                                                                                                                                                                            | 1.5e-07 | Octamer-Binding Transcription Factor 1 |



|        |                                                                                     |         |                         |
|--------|-------------------------------------------------------------------------------------|---------|-------------------------|
| FAT1   |    | 3.1e-08 | Forkhead box protein O1 |
| RHOH   |    | 4.8e-08 | NFATC4                  |
| MRPS30 |   | 1.9e-10 | FOXO1                   |
|        |                                                                                     | 5.0e-10 | ELF3                    |
|        |                                                                                     | 4.7e-08 | ZNF384                  |
| TTC33  |  | 3.7e-09 | ZNF232                  |
| FAXC   |  | 5.2e-08 | SOX8                    |

Supplementary Table S6. Common molecular targets for identified factors

| Name of identified factors | Total number of common targets | Name of targeted molecular factors            |
|----------------------------|--------------------------------|-----------------------------------------------|
| DCP2, EIF4G3, PHF6, SF3B1  | 1                              | PLEKHA4                                       |
| DCP2, GPR15, PHF6          | 1                              | miR-217-5p                                    |
| DCP2, PHF6, SF3B1          | 2                              | CCNF, RAF1                                    |
| DCP2, EIF4G3, SF3B1        | 1                              | YWHAG                                         |
| EIF4G3, PHF6, SF3B1        | 7                              | MYCN, NAA40, NTRK1, PRKN, STAU1, TRIM67, ESR1 |
| DCP2, GPR15                | 3                              | miR-148a-3p, miR-6740-3p, miR-20a-3p          |

|               |    |                                                                                                                                                                                                                                                                                                                                                                                           |
|---------------|----|-------------------------------------------------------------------------------------------------------------------------------------------------------------------------------------------------------------------------------------------------------------------------------------------------------------------------------------------------------------------------------------------|
| GPR15, PHF6   | 8  | miR-555, miR-4475, miR-143-3p, miR-2682-5p, miR-6758-5p, miR-6841-3p, miR-4780, miR-455-3p.                                                                                                                                                                                                                                                                                               |
| GPR15, SF3B1  | 1  | miR-1243                                                                                                                                                                                                                                                                                                                                                                                  |
| EIF4G3, GPR15 | 4  | miR-3924, miR-6868-3p, miR-4666a-5p, miR-1237-3p                                                                                                                                                                                                                                                                                                                                          |
| DCP2, PHF6    | 9  | SUFU, COIL, HNRNPA2B1, miR-3613-3p, miR-5094, miR-1283, miR-3117-5p, miR-4689, miR-377-3p                                                                                                                                                                                                                                                                                                 |
| DCP2, SF3B1   | 10 | PRPF40A, SRP9, SGF29, HDLBP, FANCD2, RBM8A, miR-330-3p, miR-5089-3p, miR-124-5p,                                                                                                                                                                                                                                                                                                          |
| DCP2, EIF4G3  | 4  | SNCA, DDX6, PSMC3, miR-4691-5p                                                                                                                                                                                                                                                                                                                                                            |
| PHF6, SF3B1   | 50 | TRIM31, SNRNP200, RPL10, MAP1LC3B, MAGOH, ZRANB1, CAND1, UFL1, CUL3, BRD4, BRD7, H4C1, CHD4, NUPR1, LARP7, DDRGK1, RNF113A, PRPF8, EP300, RALY, NR2C2, H1-4, RPLP0, TP53BP1, ZBTB2, RECQL4, HSPA1A/HSPA1B, FBXW7, RPS8, KLF16, CHD3, HNRNPC, MYC, PHB1, CMTR1, RPL13, BIRC3, MEPCE, CSNK1A1, MECOM, RC3H1, RNF4, SMURF1, RC3H2, FZR1, STIP1, miR-452-5p, miR-193a-3p, miR-3611, miR-4477b |
| EIF4G3, PHF6  | 9  | ESR2, CTR9, DYRK1A, RPL4, MRFAP1L1, HNRNPL, miR-6802-3p, miR-1278, miR-1301-5p                                                                                                                                                                                                                                                                                                            |
| EIF4G3, SF3B1 | 16 | VIRMA, YES1, EIF4A2, HSPA8, RPL19, GRWD1, SIRT7, FUS, EIF4E, BAP1, USP10, A1BG, LGR4, NCBP1, KIF23, miR-106a-3p                                                                                                                                                                                                                                                                           |
| PHF6          | 1  | SF3B1                                                                                                                                                                                                                                                                                                                                                                                     |
